# Supplementary material for: Accurate, rapid and high-throughput detection of strain-specific polymorphisms in Bacillus anthracis and Yersinia pestis by next-generation sequencing
Source: Springer Nature journal article supplement (doi:10.1186/2041-2223-1-5), 2010-09-01
Supplement: Additional file 4 [file 2041-2223-1-5-s4.pdf]

**Additional File 4: TaqMan oligonucleotide sequences**

| <b>Assay ID</b> | <b>Forward primer</b>                 | <b>Reverse primer</b>        | <b>MGB Probe</b>      |
|-----------------|---------------------------------------|------------------------------|-----------------------|
| Ba_50000        | GGGATTATTGTAATAATATGTTTTACAGTTCAGGACA | GTTACGTCTCCTGCTACAAGCT       | CCACTCGCAGTTAACG      |
| Ba_120000       | TGTTGAGCGCGGTATCGTT                   | CATTTTCTTCAGCAAGACCGATGAT    | CTACTACGTCACCACTTT    |
| Ba_130000       | GCGCACAAGTTCTCTTCAAGTG                | GTACGAAACATTAGATCACCTCAACTGA | CTGCTTCAATTGCTTCTTTAG |
| Ba_200000       | CCGACACGTGGTAATGAAAGAAGTA             | CAAATATGCAATCCGTAACGCTTTATCT | CAGTTCCCCATAGTAAACC   |
| Yp_4560000      | ATGCGCCCCACGAGAAT                     | GCCCGATGCTGGGTAATTCA         | TCGCCACTAAAGAATG      |
| Yp_4570000      | TGAGGATGTGATAGCGCAATGTC               | CAATGAGATGGCGGCATTACTG       | CCGGCGACGACAGTATC     |
| Yp_4605000      | GCCATGGCGTAACCCATC                    | GGCTCAGCAAATTCTTACCGATT      | CCCATTTGACTGACCAGTTG  |
| Yp_4620000      | TCGGAATATACTGGTGTCCCCTT               | CGGTGAGATCCTTTGCCGATTAATA    | CCCCTTCTCAGGCAATG     |

Assays beginning with Ba\_ target the B. anthracis A0377 amplification

Assays beginning with Yp\_ target the Y. pestis La Paz amplification

Numbers in assay IDs are approximate chromosomal coordinates

All probes are labeled with 6-FAM at the 5' end and MGB at the 3' end
